# Supplementary material
Source: ML conference proceedings conference paper supplement (https://openaccess.thecvf.com/content/ICCV2025/html/Han_ASCENT_Annotation-free_Self-supervised_ICCV_2025_paper.html)
Supplement: Supplementary file 1 [file ASCENT_Supplementary_Notes.pdf › 12001_supp/ASCENT_Supplementary_Notes.pdf]

# ASCENT: Annotation-free Self-supervised Contrastive Embeddings for 3D Neuron Tracking in Fluorescence Microscopy

## Supplementary Material

### 6.1. Hyperparameter Tuning on Embedding Size

To determine the optimal dimensions for the projection head and the final embedding vector, we performed a grid search over the linear layer dimension ( $l \in \{256, 512, 1024, 2048\}$ ) and the final embedding size ( $d \in \{64, 128, 256, 512\}$ ). We found the model’s performance to be robust to these hyperparameters. The final tracking accuracies for all tested combinations fell within a narrow range of 94.90% (for  $l = 256, d = 64$ ) to 95.10% (for  $l = 1024, d = 512$ ). Based on this, we selected the configuration of  $l = 1024$  and  $d = 256$  used in the main paper as a representative choice that balances performance and dimensionality.

### 6.2. Implementation Details for Data Transformations

We implemented five 3D data augmentation classes adapted from standard `torchvision` (`tv`) transformations (see Fig. 7 for examples). The parameters were:

- **Random rotation:** Randomly rotates the input volume around the z-axis by an angle uniformly sampled from  $[-180^\circ, 180^\circ]$ . This operation follows the logic of `tv.transforms.RandomRotation`, applied consistently to each z-slice.
- **Random resized crop:** Performs a random crop on the XY-plane of the volume and resizes the cropped region to a fixed output size. We set the output size to (448,448), with a random crop scale between 0.6 and 1.0. This transformation extends `tv.transforms.RandomResizedCrop` to 3D data by applying the same crop and resize to all z-slices.
- **Random color jitter:** Randomly adjusts the brightness and contrast of the input. `brightness=0.2` and `contrast=0.2` parameters are used. This transformation is directly adapted from `tv.transforms.ColorJitter` to operate on multi-channel 3D images.
- **Random position jitter:** Applies a random translation to the neuron’s coordinates within the volume to simulate localization uncertainty. The jitter ranges are set to 5.0 units in the XY-plane and 1.0 unit in the z-axis.
- **Random elastic deformation:** Elastic deformation is applied to the XY-plane of each 3D volume. A  $3 \times 3$  grid of control points is generated, and a displacement field is computed by sampling displacements at each grid point from a normal distribution with mean 0 and  $\sigma = 36$ . The displacements are bilinearly interpolated across the image to produce a smooth deformation that warps the input.

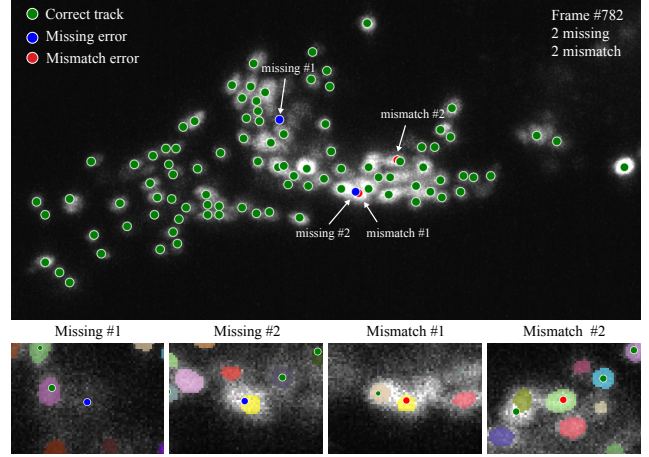

Figure 6. **Qualitative example of tracking error** The main panel shows a maximum intensity projection of an error-prone frame (#782), with ground-truth neurons colored by tracking status: correctly tracked (green), missing (blue), or mismatched (red). Bottom panels show zoomed-in views of individual errors at the relevant z-plane with the StarDist-generated segmentation mask overlaid. The analysis confirms most errors are attributable to the upstream detector, including failed detection (Missing #1), undersegmentation (Missing #2, Mismatch #1), and a single true linking failure (Mismatch #2).

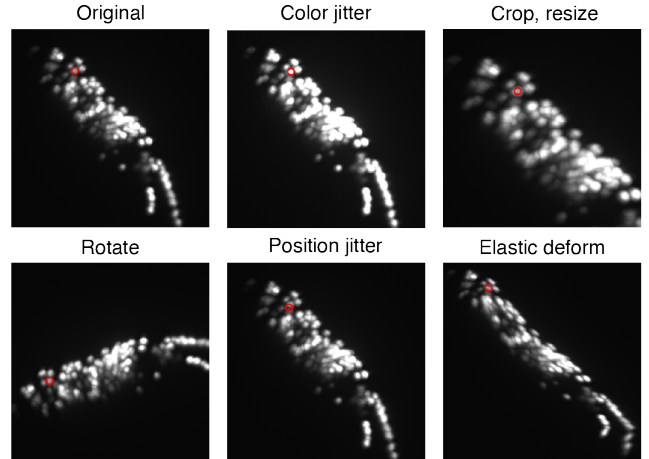

Figure 7. **Examples of random transformations.** The images are maximum intensity projections along the z-axis. The red circle marks the target object, illustrating the effect of the applied transformations.
